# Supplementary material
Source: HighWire-hosted journal article supplement (https://erj.ersjournals.com/content/57/4/2004423)
Supplement: inline-supplementary-material-1 [file inline-supplementary-material-1.pdf]

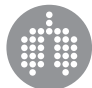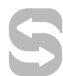

SHAREABLE PDF

EDITORIAL

INFECTION AND LUNG FUNCTION

ERJ European Respiratory Journal Eur Respir J 0903-1936/1399-3003 European Respiratory Society 10.1183/13993003.04423-2020 ERJ-04423-2020 EDITORIAL INFECTION AND LUNG FUNCTION

Nefer, Sinuhe and clinical research assessing post COVID-19 condition J.B. SORIANO ET AL. INFECTION AND LUNG FUNCTION Clinical research on post-COVID-19 syndrome

Soriano Joan B.<sup>1,2</sup>, Waterer Grant<sup>3</sup>, Peñalvo José L.<sup>4</sup>, Rello Jordi<sup>2,5,6</sup>,

1Servicio de Neumología, Hospital Universitario de La Princesa, Universidad Autónoma de Madrid, Madrid, Spain. 2Centro de Investigación en Red de Enfermedades Respiratorias (CIBERES), Instituto de Salud Carlos III (ISCIII), Madrid, Spain. 3School of Medicine, University of Western Australia, Perth, Australia. 4Unit of Non-Communicable Diseases, Department of Public Health, Institute of Tropical Medicine, Antwerp, Belgium. 5Clinical Research in Pneumonia and Sepsis (CRIPS), Vall d'Hebron Institute of Research (VHIR), Barcelona, Spain. 6Clinical Research, CHU Nîmes, Nîmes, France.

**Correspondence:** Joan B. Soriano, Hospital Universitario de la Princesa, Servicio de Neumología, 6ª planta, Diego de León 62, 28030-Madrid, Spain. E-mail: jbsoriano2@gmail.com 202120215705122020111220202021

*"...For this reason I will tell you my name, which is Nefernefernefer. My eyes are as green as Nile water in the heat of summer. I am judged so beautiful that no one, after having said my name three times, can avoid forgetting me."*
